# Supplementary material for: Photo-responsive heterojunction nanosheets of reduced graphene oxide for photo-detective flexible energy devices
Source: Royal Society of Chemistry journal article supplement (doi:10.1039/c8ta11442k), 2019-01-01
Supplement: c8ta11442k1.pdf [file c8ta11442k1.pdf]

## Supporting Information

### Photo-responsive heterojunction nanosheets of graphene for self-powered flexible devices

Lu Zong,<sup>‡ab</sup> Xiankai Li,<sup>‡ab</sup> Luting Zhu,<sup>‡a</sup> Xiankai Li,<sup>ab</sup> Jun You,<sup>a</sup> Zehui Li,<sup>d</sup> Hongwei Gao,<sup>\*c</sup> Mingjie Li<sup>\*a</sup> and Chaoxu Li<sup>\*ab</sup>

<sup>a</sup>Group of Biomimetic Smart Materials, Qingdao Institute of Bioenergy and Bioprocess Technology, Chinese Academy of Sciences, Songling Road 189, Qingdao 266101, P. R. China.

<sup>b</sup>Center of Material and Optoelectronics Engineering, University of Chinese Academy of Sciences, 19A Yuquan Road, Beijing 100049, P. R. China.

<sup>c</sup>School of Life Science, Ludong University, Middle Hongqi Road 186, Yantai 264025, P. R. China

<sup>d</sup>State Key Joint Laboratory of Environment Simulation and Pollution Control, School of Environment, Tsinghua University, Shuangqing Road 30, Beijing 100084, P. R. China

<sup>‡</sup>These authors contributed equally to this work.

\*E-mail: [gaohongw369@163.com](mailto:gaohongw369@163.com) (H. Gao); [limj@qibebt.ac.cn](mailto:limj@qibebt.ac.cn) (M. Li); [licx@qibebt.ac.cn](mailto:licx@qibebt.ac.cn) (C. Li).

## 21 **Supporting experimental section**

22 *Electrochemical Characterization:* Electrochemical measurements were conducted with a  
23 typical three-electrode system on a CHI660E electrochemical workstation (CH Instrument,  
24 Shanghai, China) and performed in 6 M KOH solution at room temperature (25 °C). A  
25 platinum slice (10 × 10 × 0.1 mm<sup>3</sup>) served as the counter electrode, and Hg/HgO electrode as  
26 the reference electrode. The working electrode was prepared as follows: the as-prepared inks  
27 (0.5 mg mL<sup>-1</sup>) was coated onto Ni foam (10 × 10 mm<sup>2</sup>), dried at 100 °C for 12 h in a vacuum  
28 dryer, and then pressed at 10 MPa for 2 min with a tablet press machine to obtain the working  
29 electrode. The load of active materials in each working electrode was about 1.0 ± 0.1 mg.  
30 Cyclic voltammetry (CV) was measured at different scan rates between -1 and 0 V. The  
31 galvanostatic charge-discharge tests were performed at different current densities from 0.5 to  
32 20 A g<sup>-1</sup> within the same voltage range as CV. Electrochemical impedance spectroscopy (EIS,  
33 Nyquist plots) was recorded at open circuit potential superimposed with an amplitude of 10  
34 mV over a frequency range from 10<sup>5</sup> to 0.1 Hz. The gravimetric capacitance for a single  
35 electrode  $C_s$  (F g<sup>-1</sup>) was calculated according to the following equation:

$$36 \quad C = I\Delta t / m\Delta E$$

37 where  $I$  is the discharge current (A),  $\Delta t$  is the discharge time (s),  $m$  is the mass of the active  
38 material in the working electrode (g) and  $\Delta E$  is the voltage change excluding the IR drop  
39 during the discharge process (V).

40 For the planar capacitor, CV was measured from 5 to 5000 mV s<sup>-1</sup>. Galvanostatic charge-  
41 discharge test was performed at different current densities from 0.4 to 10 A g<sup>-1</sup>. EIS  
42 measurements were recorded by employing 10 mV amplitude in the frequency range of 10<sup>5</sup> to  
43 0.1 Hz. The areal capacitance for device,  $C$  (F cm<sup>-2</sup>), was calculated according to the  
44 following equation:

$$45 \quad C = I\Delta t / S\Delta E$$

46 where  $I$  is the charge/discharge current (A),  $\Delta t$  is the discharge time (s),  $S$  is the area of the  
47 device ( $\text{cm}^2$ ) and  $\Delta E$  is the voltage change excluding the IR drop during the discharge process  
48 (V).

49 *Theoretical Calculation:* In our work, all spin-polarized plane-wave density functional theory  
50 (DFT) calculations were carried out using the DMol module of Materials Studio (MS) 8.0.<sup>S1-</sup>  
51 <sup>S3</sup> We adopt the generalized gradient approximation (GGA) with Perdew–Burke–Ernzerhof  
52 (PBE) to describe the exchange and correlation energy, as the functional was proved to be  
53 efficient in calculating the GO adsorption<sup>S3-S5</sup>. We employed the basis set, double numerical  
54 plus polarization (DNP), to describe the valence orbital of all the atoms. The all-electron  
55 relativistic method was applied to treat the core electrons. A smearing width of 0.005 Ha was  
56 utilized, which can significantly improve computational performance. When the convergence  
57 criteria with respect to the energy, force and displacement (i.e.,  $1.0 \times 10^{-5}$  Ha,  $2.0 \times 10^{-3}$  Ha/Å  
58 and  $5.0 \times 10^{-3}$  Å) were satisfied, the structure optimization would be considered to be complete.  
59 In all calculations, the global orbital cutoff we chose was 5.0 Å and the k-point was  $3 \times 3 \times 1$ .

60 For this study, the adsorption energies ( $E_{ad}$ ) between the GO and MoS<sub>2</sub> is calculated by  
61 the following equation:

$$62 \quad E_{ad} = E_{GO+MoS_2} - (E_{GO} + E_{MoS_2})$$

63 where  $E_{GO+ MoS_2}$  refers to the total energy of the MoS<sub>2</sub> surface with adsorbed GO;  $E_{GO}$  and  
64  $E_{MoS_2}$  refer to the calculated energies of GO sheet and clean MoS<sub>2</sub> surface respectively. By  
65 this definition, a positive  $E_{ad}$  value indicates that adsorption process is endothermic and  
66 adsorption system is unstable; a negative  $E_{ad}$  value indicates that adsorption process is  
67 exothermic and adsorption system is stable.

69 **Supporting tables**

70 **Table S1** Content of functional groups in GO, MoS<sub>2</sub> on GO, rGO and MoS<sub>2</sub> on rGO by XPS.

|                               |                      |                       |                   |                   |                     |                   |
|-------------------------------|----------------------|-----------------------|-------------------|-------------------|---------------------|-------------------|
| GO                            | Group                | C-C/C=C<br>(284.6 eV) | C-O<br>(286.5 eV) | C=O<br>(287 eV)   | COOH<br>(288.1 eV)  |                   |
|                               | Concentration<br>(%) | 60.7                  | 18.8              | 16.3              | 4.2                 |                   |
| MoS <sub>2</sub><br>on GO     | Group                | C-C/C=C<br>(284.5 eV) | C-O<br>(286.4 eV) | C=O<br>(286.9 eV) | COOH<br>(287.9 eV)  |                   |
|                               | Concentration<br>(%) | 64.3                  | 18                | 14.4              | 3.2                 |                   |
| rGO                           | Group                | C-C/C=C<br>(284.7 eV) | C-O<br>(286.5 eV) | C=O<br>(288 eV)   | C(O)O<br>(289.2 eV) | C-N<br>(285.7 eV) |
|                               | Concentration<br>(%) | 74.3                  | 7.2               | 4.3               | 1.9                 | 8.4               |
| MoS <sub>2</sub><br>on<br>rGO | Group                | C-C/C=C<br>(284.6 eV) | C-O<br>(286.2 eV) | C=O<br>(287.8 eV) | C(O)O<br>(289.1 eV) | C-N<br>(285.5 eV) |
|                               | Concentration<br>(%) | 77.2                  | 8.0               | 2.8               | 1.2                 | 9.7               |

71

73 **Table S2** Comparison of electrochemical performance with other planar supercapacitors.

| Electrode                            | Power density<br>(mW cm <sup>-2</sup> ) | Energy density<br>(mWh cm <sup>-2</sup> ) | Reference  |
|--------------------------------------|-----------------------------------------|-------------------------------------------|------------|
| rGO                                  | 0.0090                                  | 0.014                                     | S6         |
| rGO quantum dots                     | 0.0075                                  | 0.074                                     | S7         |
| rGO/Poly(3,4-ethylenedioxythiophene) | 0.020                                   | 0.0068                                    | S6         |
| rGO/carbon nanotube                  | 0.050                                   | 0.0038                                    | S8         |
| titanium carbide nanosheet           | 0.045                                   | 0.0030                                    | S9         |
| rGO/Mo                               | 0.075                                   | 0.00022                                   | S10        |
| TiN/CNT                              | 0.097                                   | 0.0027                                    | S11        |
| rGO/polypyrrole/MnO <sub>2</sub>     | 1.3                                     | 0.0092                                    | S12        |
| MoS <sub>2</sub> on rGO              | 0.20                                    | 0.053                                     | This study |

75 *Supporting figures*

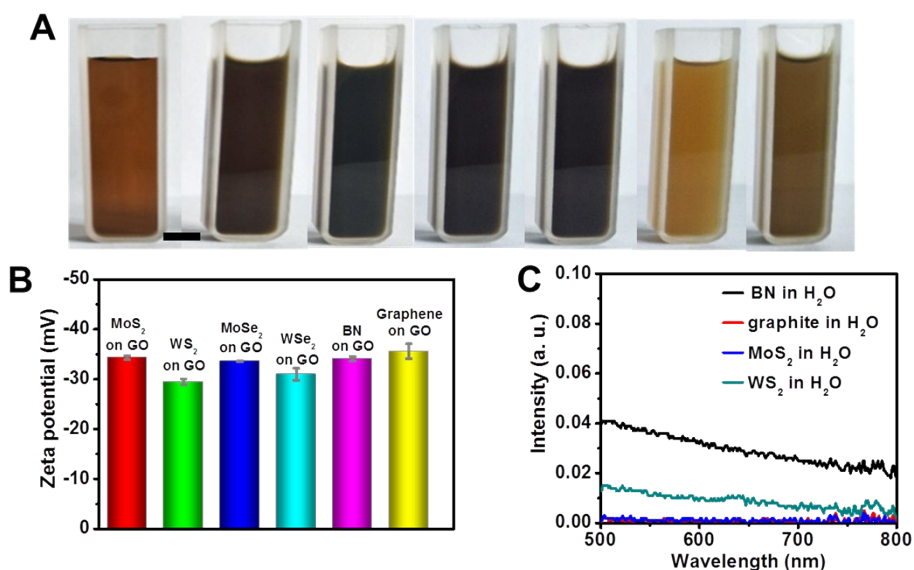

76

77 **Fig. S1** (A & B) Visual observations (A) and Zeta potential values (B) of exfoliated solution:  
78 GO, MoS<sub>2</sub> on GO, WS<sub>2</sub> on GO, MoSe<sub>2</sub> on GO, WSe<sub>2</sub> on GO, BN on GO and graphene on GO  
79 (From left to right). Scale bar is 5 mm. (C) UV-vis spectra of exfoliated 2D nanomaterials  
80 without GO.

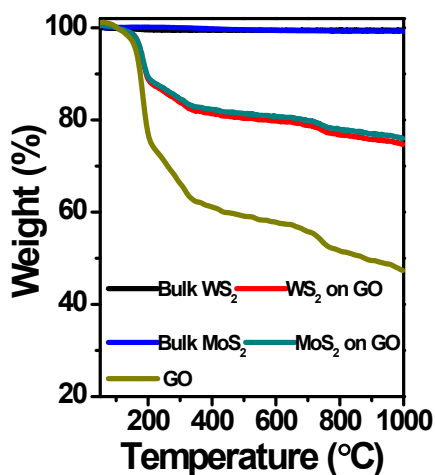

81

82 **Fig. S2** Thermogravimetric analysis (TGA) of GO, TMDs and their heterogeneous structures  
83 at a heating rate of 20 °C min<sup>-1</sup> under 40 mL min<sup>-1</sup> N<sub>2</sub> flow. The TMDs concentration was  
84 evaluated by TGA according to a simple addition rule. Sample was produced by using GO  
85 (O/C 64.7 atm%) concentration 1 mg mL<sup>-1</sup> and initial MoS<sub>2</sub> dosage 0.5 wt% at *pH* 10 and for  
86 exfoliation time 60 h.

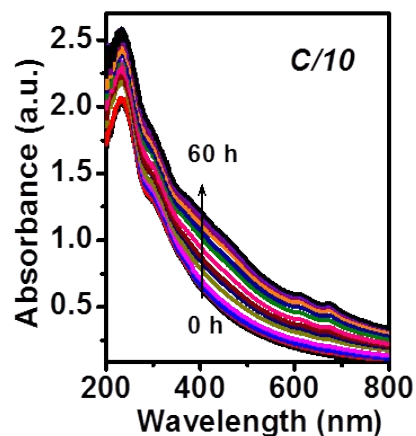

87

88 **Fig. S3** UV-vis spectra of exfoliated MoS<sub>2</sub> produced in 1 mg mL<sup>-1</sup> GO solution for different  
 89 sonication time. Absorption peaks are located at ~670 nm. Experimental parameters: GO  
 90 (O/C 64.7 atm%) concentration 1 mg mL<sup>-1</sup>; initial MoS<sub>2</sub> dosage 0.5 wt%; pH 10. C/10 refers  
 91 to suspension dilution up to 10 times for UV-vis analysis.

92

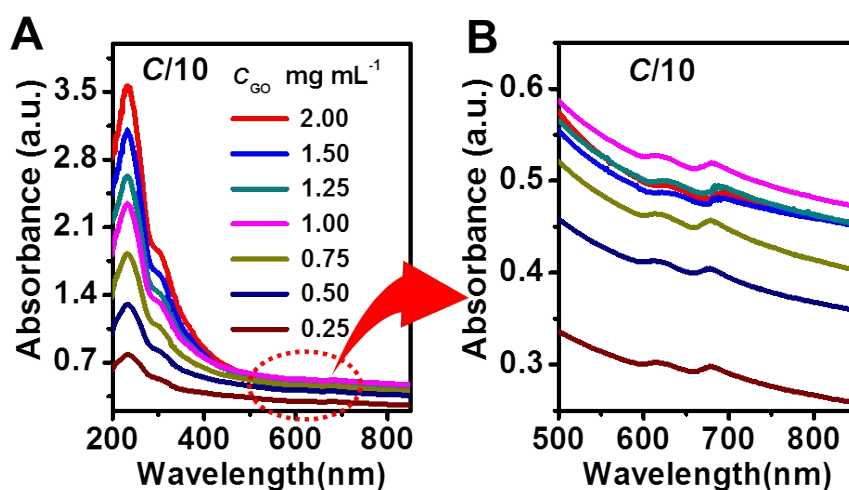

93

94 **Fig. S4** Influence of GO concentrations on UV-vis spectra of exfoliated MoS<sub>2</sub> produced at  
 95 different GO (O/C 64.7 atm%) concentrations. (A) Wavelength of 200~850 nm. (B)  
 96 Wavelength of 500~850 nm. Initial MoS<sub>2</sub> dosage 0.5 wt%; pH 10; exfoliation time 60 h. C/10  
 97 refers to suspension dilution up to 10 times for UV-vis analysis.

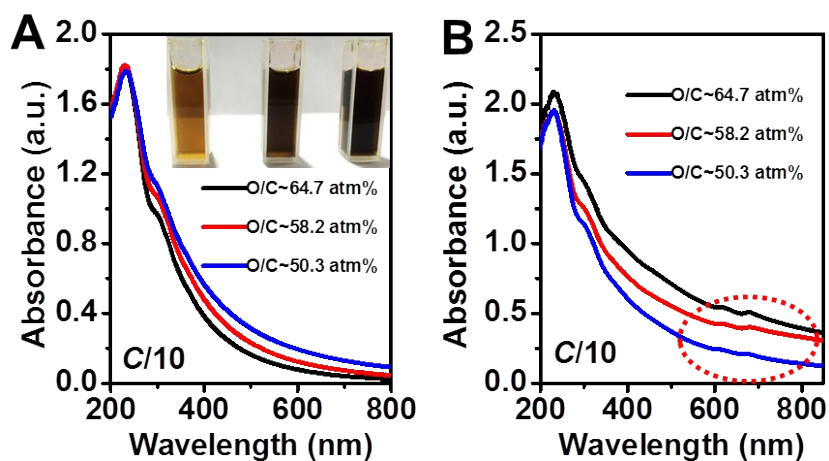

99

100 **Fig. S5** (A) UV-vis spectra of GO solution with different contents of O-containing groups.

101 (B) UV-vis spectra of MoS<sub>2</sub> exfoliated in solution of GO with different contents of O-

102 containing groups. GO concentration: 1 mg mL<sup>-1</sup>; Initial MoS<sub>2</sub> dosage: 0.5 wt%; *pH* 10;

103 Exfoliation time: 60 h. *C/10* refers to suspension dilution up to 10 times for UV-vis analysis.

104



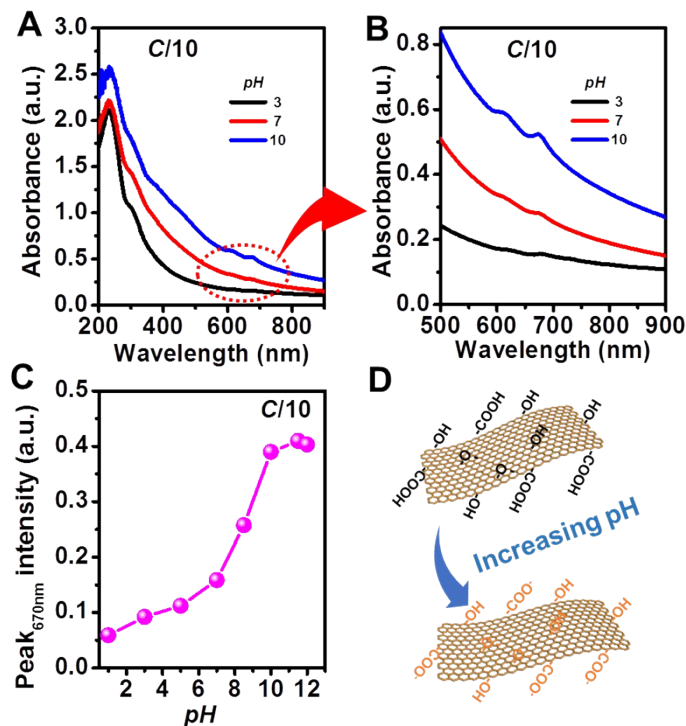

106

107 **Fig. S6** (A-B) UV-vis spectra of MoS<sub>2</sub> exfoliated in GO solution at different *pH* values. (C)  
 108 Dependence of UV-vis absorption at 670 nm of exfoliated MoS<sub>2</sub> on *pH* in GO solution. (D)  
 109 Schematic illustration of ionic GO at basic *pH* values. At higher *pH* values, ionized oxygen  
 110 species increased the GO dispersibility, and facilitated adsorption of MoS<sub>2</sub> on GO.<sup>S13</sup> GO:  
 111 O/C 64.7 atm%; GO concentration: 1 mg mL<sup>-1</sup>; Initial MoS<sub>2</sub> dosage: 0.5 wt%; Exfoliation  
 112 time: 60 h. *C/10* refers to suspension dilution up to 10 times for UV-vis analysis.

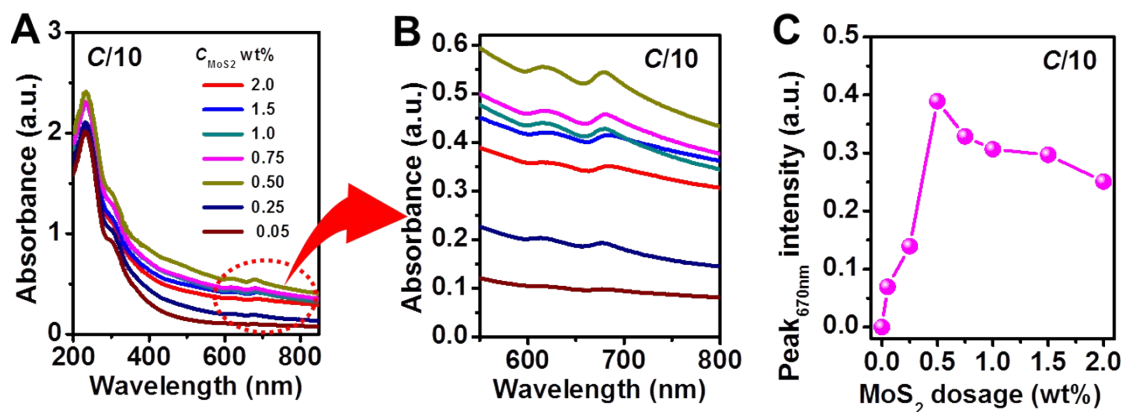

114

115 **Fig. S7** (A & B) UV-vis spectra of MoS<sub>2</sub> exfoliated with at different dosages of bulk MoS<sub>2</sub>.

116 (C) Dependence of UV-vis absorption at 670 nm of exfoliated MoS<sub>2</sub> on different dosages of

117 bulk MoS<sub>2</sub>. GO: O/C 64.7 atm%; GO concentration: 1 mg mL<sup>-1</sup>; pH 10; Exfoliation time: 60

118 h. C/10 refers to suspension dilution up to 10 times for UV-vis analysis.

119

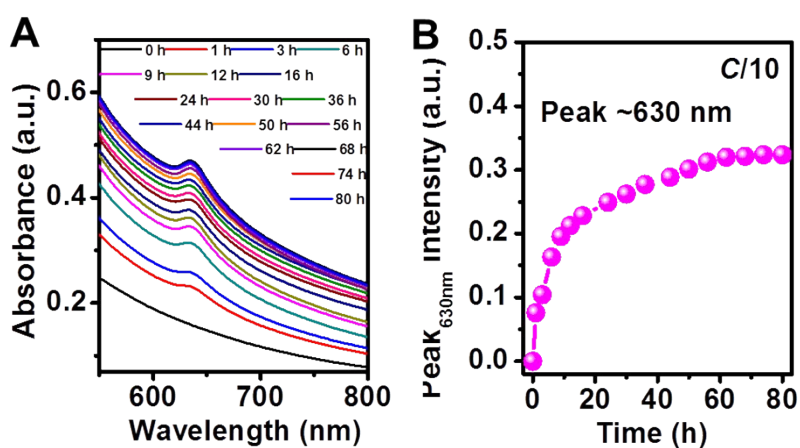

120

121 **Fig. S8** (A) UV-vis spectra of WS<sub>2</sub> exfoliated in GO solution with different ultrasonication

122 time. (B) Dependence of UV-vis absorption at 630 nm of exfoliated WS<sub>2</sub> on different

123 ultrasonication time. GO: O/C 64.7 atm%; GO concentration: 1 mg mL<sup>-1</sup>; pH 10; Initial WS<sub>2</sub>

124 dosage: 1 wt%. C/10 refers to suspension dilution up to 10 times for UV-vis analysis.

125

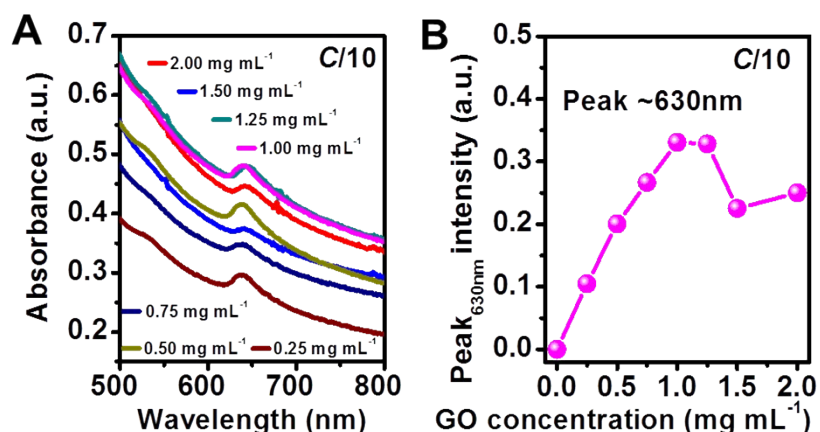

126

127 **Fig. S9** (A) Influence of GO concentrations on UV-vis spectra of exfoliated WS<sub>2</sub> produced at  
 128 different GO (O/C 64.7 atm%) concentrations. (B) Dependence of UV-vis absorption at 630  
 129 nm of exfoliated WS<sub>2</sub> on different GO (O/C 64.7 atm%) concentrations. Initial WS<sub>2</sub> dosage: 1  
 130 wt%; *pH* 10; Exfoliation time: 60 h.

131

132

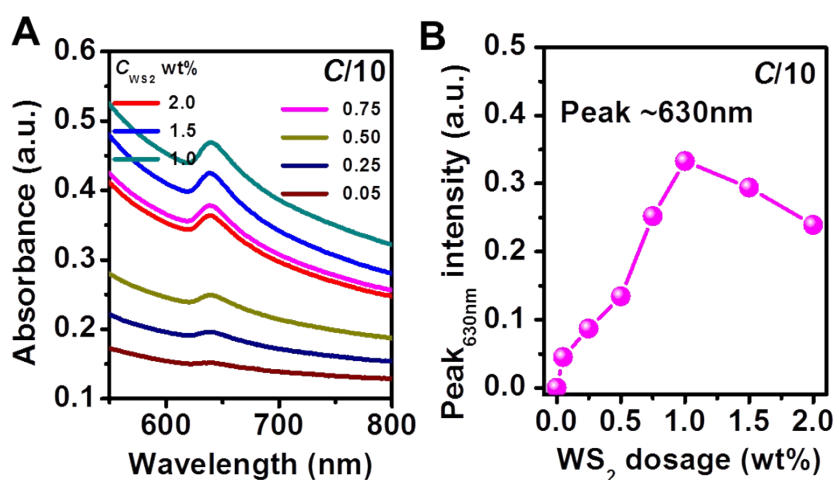

133

134 **Fig. S10** (A) UV-vis spectra of WS<sub>2</sub> exfoliated with at different dosages of bulk WS<sub>2</sub>. (B)  
 135 Dependence of UV-vis absorption at 630 nm of exfoliated WS<sub>2</sub> on dosages of bulk WS<sub>2</sub>. GO:  
 136 O/C 64.7 atm%; GO concentration: 1 mg mL<sup>-1</sup>; *pH* 10; Exfoliation time: 60 h.

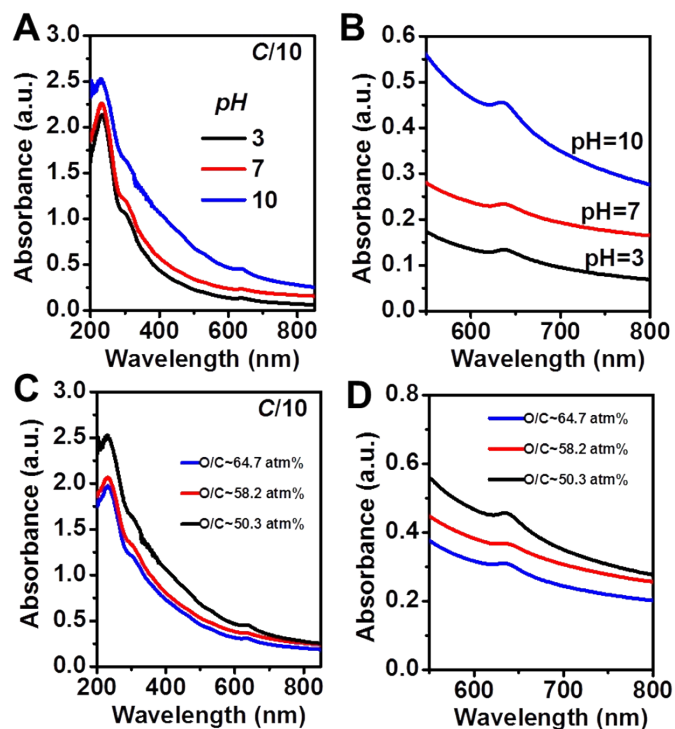

137

138 **Fig. S11** (A-B) UV-vis spectra of WS<sub>2</sub> exfoliated in GO solution at different *pH* values. GO:  
 139 O/C 64.7 atm%; GO concentration: 1 mg mL<sup>-1</sup>; Initial WS<sub>2</sub> dosage: 1 wt%; Exfoliation time:  
 140 60 h. (C-D) UV-vis spectra of WS<sub>2</sub> exfoliated in solution of GO with different contents of O-  
 141 containing groups. GO concentration: 1 mg mL<sup>-1</sup>; Initial WS<sub>2</sub> dosage: 1 wt%; *pH* 10;  
 142 Exfoliation time 60 h.

143

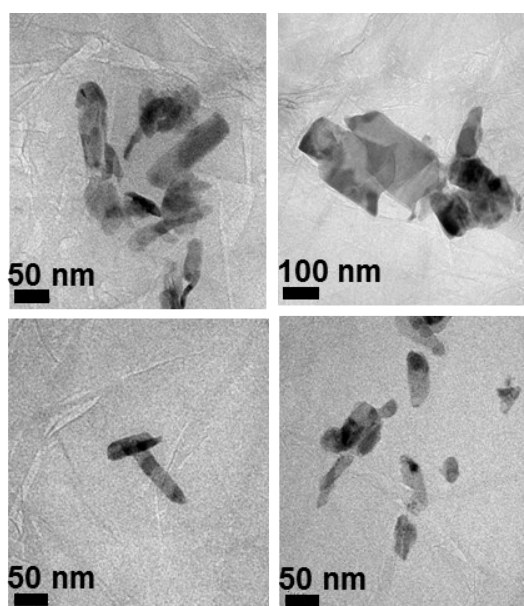

144

145 **Fig. S12** Typical TEM images of heterojunction nanosheets of MoS<sub>2</sub> on GO nanosheets.

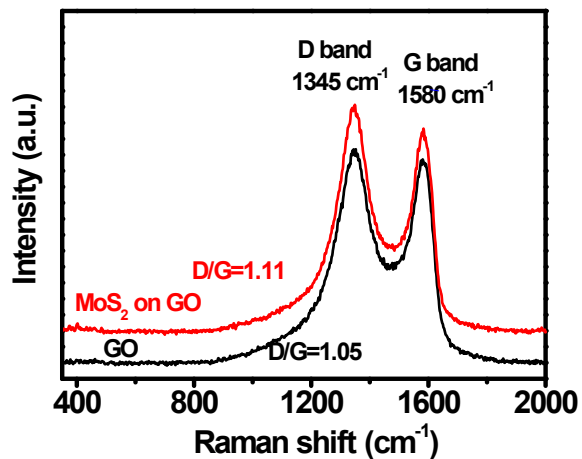

146

147 **Fig. S13** Raman spectra of GO and heterojunction nanosheets of MoS<sub>2</sub> on GO.

148

149

150

151

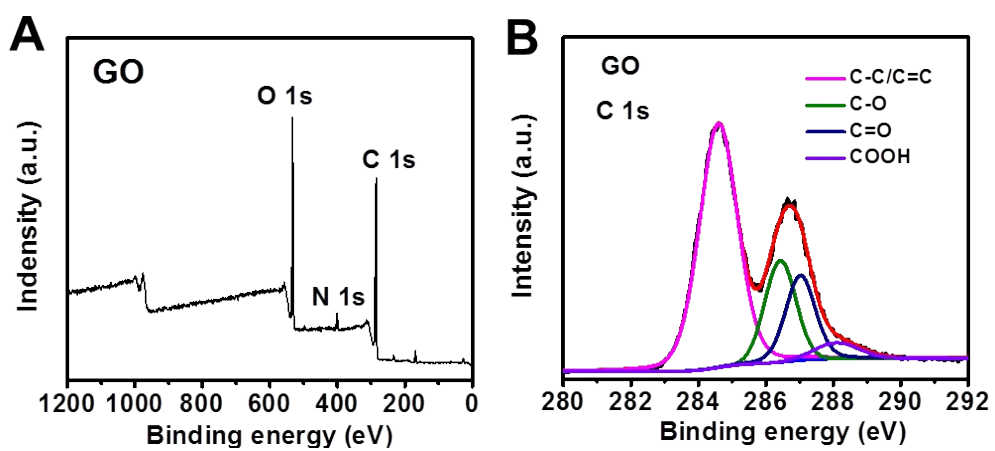

152

153 **Fig. S14** XPS spectra of GO. Wide-scan survey (A) and C1s XPS spectra (B).

154

155

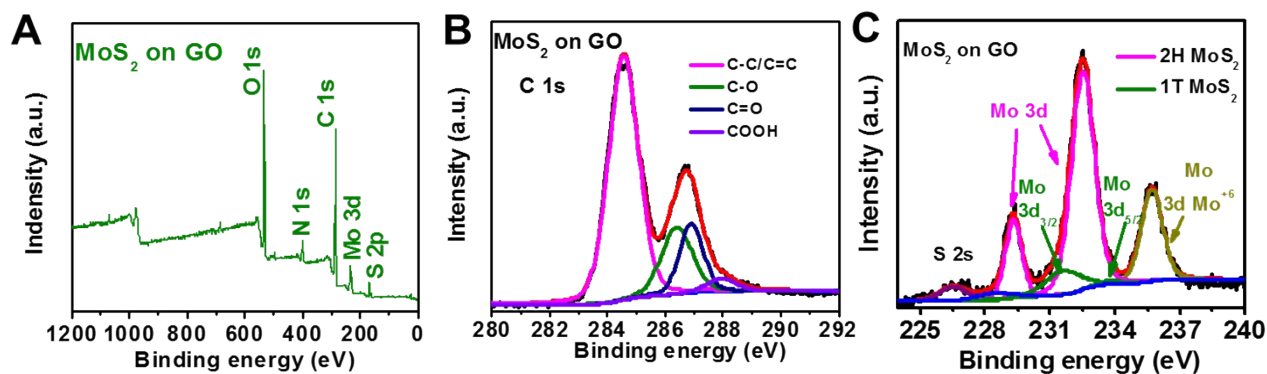

156

157 **Fig. S15** XPS spectra of heterojunction of heterojunction nanosheets of MoS<sub>2</sub> on GO. (A)

158 Wide-scan survey. (B) C1s. (C) Mo3d/S2s.

159

160

161

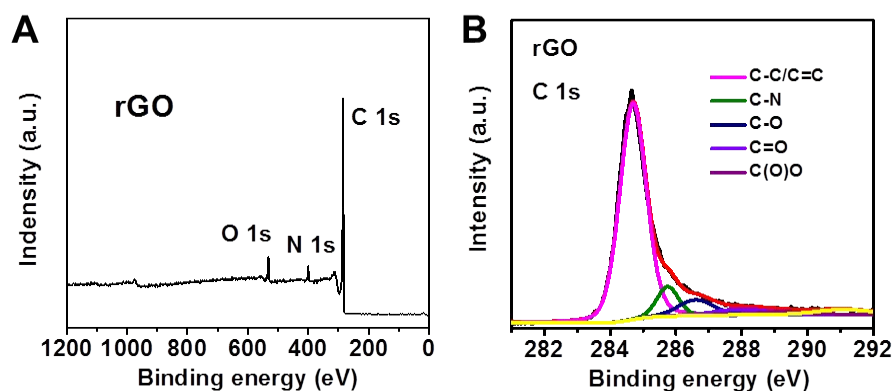

162

163 **Fig. S16** XPS spectra of rGO. (A) Wide-scan survey. (B) C1s XPS spectra.

164

165

166

167



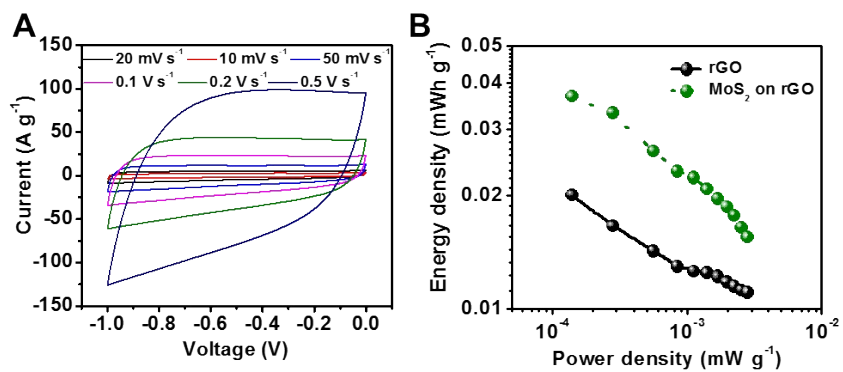

173

174 **Fig. S18** Electrochemical tests of heterojunction nanosheets of MoS<sub>2</sub> on rGO in three-  
 175 electrode system. (A) Cyclic voltammograms at different scan rates. (B) Ragone plots. rGO  
 176 was given for comparison.



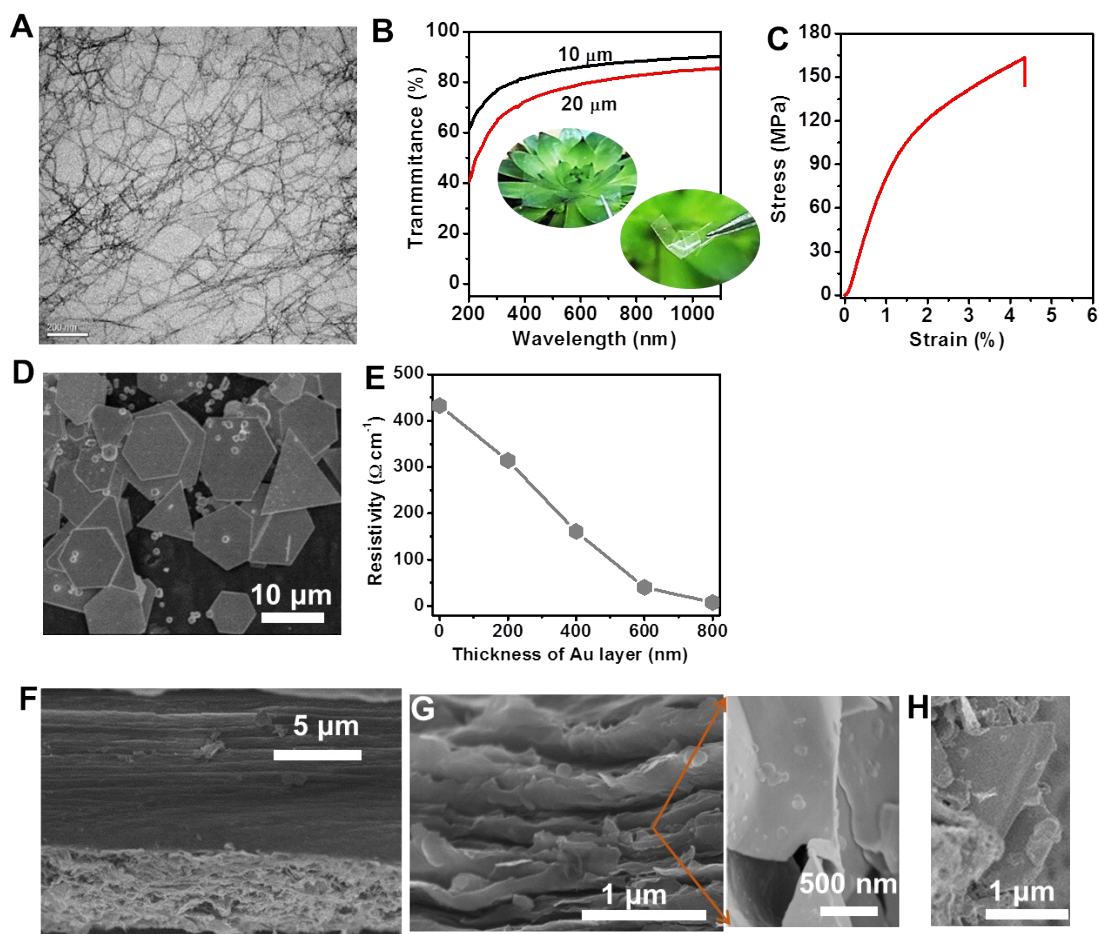

178

179 **Fig. S19** (A) TEM image of CNFs. (B) Light transmittance (%) of CNFs film with different  
 180 thicknesses. Inset shows photographs of flexible and transparent CNF film (10 μm in  
 181 thickness). (C) Stress–strain curve of CNFs film. (D) SEM image of Au microflakes. (E)  
 182 Resistivity vs thickness of Au layer. (F-H) Cross-section SEM images of the capacitor: three  
 183 distinct layers of cellulose, heterojunction nanosheets and Au flakes (F), heterojunction  
 184 nanosheets layer with nacre-like structure (B) and Au flakes (C).

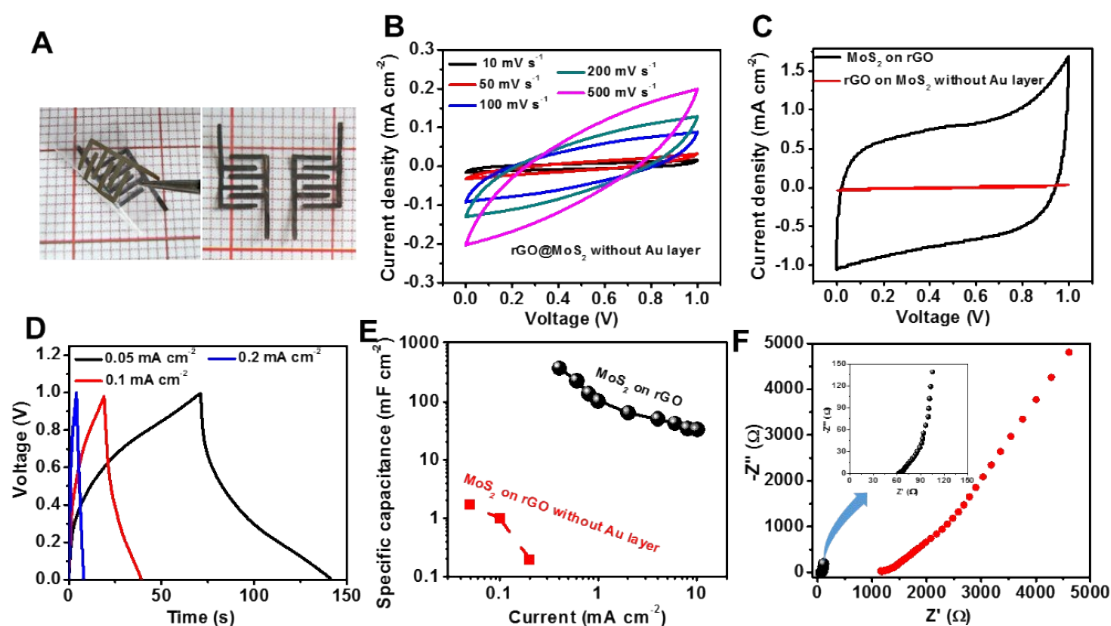

186

187 **Fig. S20** (A & B) Planar capacitor without Au layer: Flexibility and stability demonstration

188 (A) and CV curves of at different scan rates of 5–500  $\text{mV s}^{-1}$  (B). (C-F) Electrochemical tests

189 of planar capacitor based on heterojunction nanosheets of  $\text{MoS}_2$  on rGO: CV curves at 50  $\text{mV}$

190  $\text{s}^{-1}$  (C), Galvanostatic charge–discharge curves at different current densities (D), Ragone plots

191 (E) and Nyquist plots (F). Planar capacitor without Au layer was tested as control.

192

193

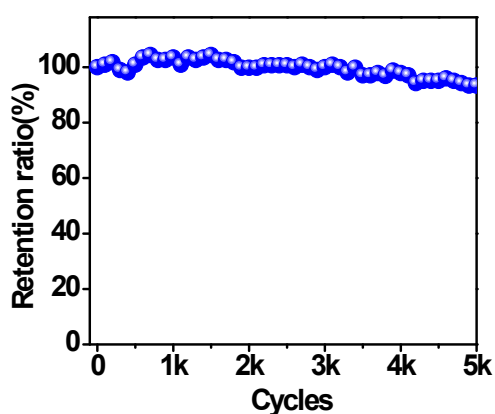

194

195 **Fig. S21** Capacitance retention of as-prepared planar capacitor under long-term

196 charge–discharge cycles.

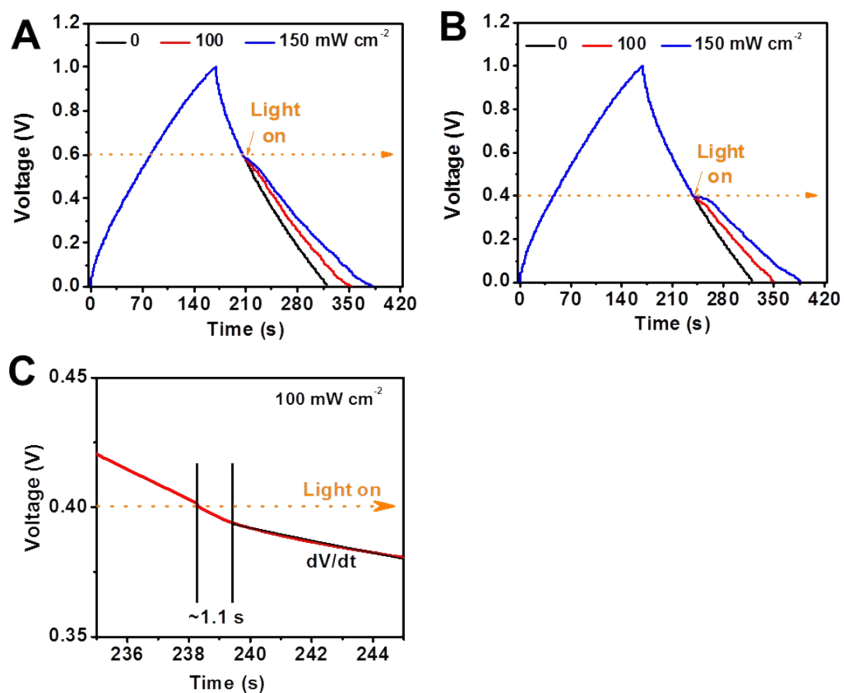

197

198 **Fig. S22** Charge–discharge curve ( $1 \text{ mA cm}^{-2}$ ) under continuous NIR irradiation with  
 199 different photo intensities starting at 0.6 V (A) and 0.4 V (B). (C) Zoom-in curve of (B).

200

201

202

203

204

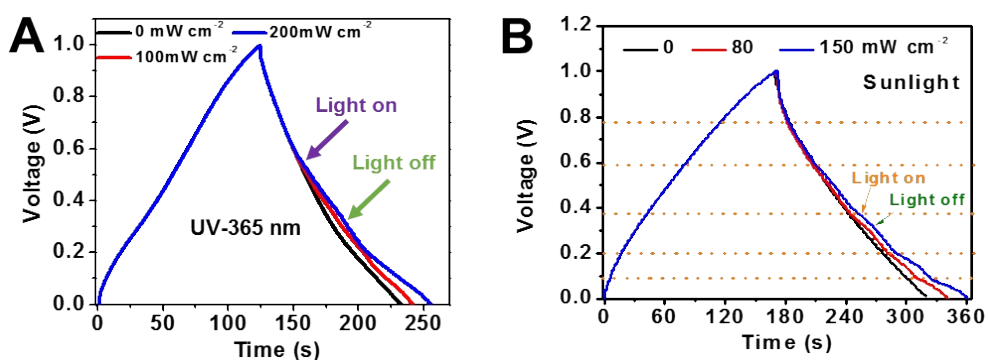

205

206 **Fig. S23** Charge–discharge curve ( $1 \text{ mA cm}^{-2}$ ) under periodic UV (A) and sunlight (B)  
 207 irradiation with different photo intensities.

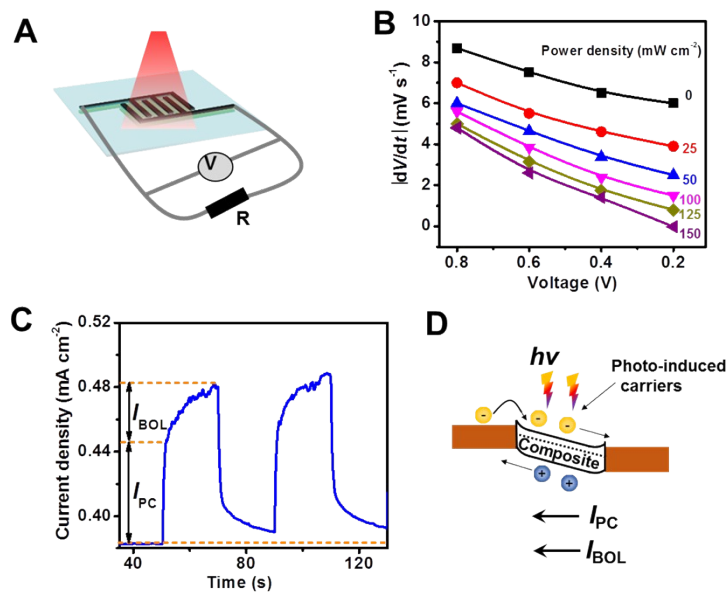

209

210 **Fig. S24** (A) Schematic illustration of setup. (B) Dependence of estimated discharge rate  
 211 ( $|dV/dt|$ ) on light intensity at different different NIR intensities. (C) Photoconduction ( $I_{PC}$ ) and  
 212 bolometric photocurrent ( $I_{BOL}$ ). (D) Suggested schematic illustration of the photoelectric  
 213 responsivity of the hybrid nanosheets.

214

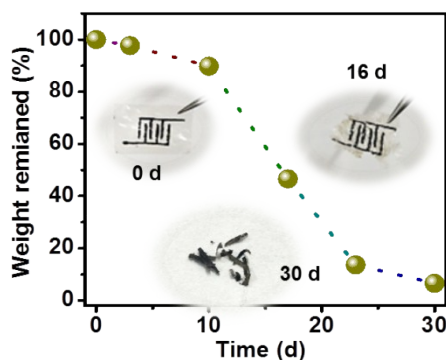

215

216 **Fig. S25** Time dependence of weight loss for biodegradation of capacitor in soil. The inset  
 217 gives visual observations after different degradation periods. To perform the biodegradation  
 218 test, the capacitor was buried in natural soil at 2 cm depth. At designed interval, the degraded  
 219 sample was excavated out, cleaned carefully with ethanol, and then dried under 50 °C for 2 h.  
 220 The sample with degradation time from 0 to 30 days was characterized with the mass change  
 221 for the degradation kinetics.

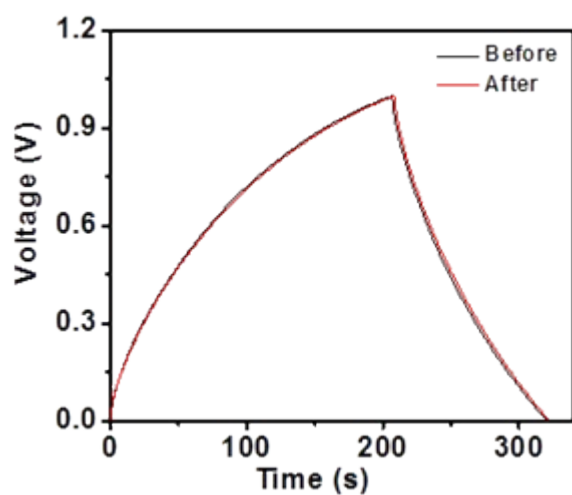

223

224 **Fig. S26** Galvanostatic charge–discharge curves after vapor permeability and successively  
 225 balanced in air condition (25 °C; Humidity 25%) for one day. Punched CNFs film (Mesh  
 226 number~100, pore size~0.2 mm).

227

228

229

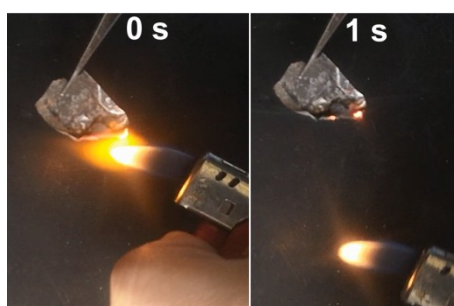

230

231 **Fig. S27** Optical images of the soft capacitor on flaming fire (Left) and away from the fire  
 232 (Right).

234 **Supporting references:**

- 235 S1. B. Delley, *J. Chem. Phys.*, 1990, **92**, 508-517.
- 236 S2. B. Delley, *J. Chem. Phys.*, 2000, **113**, 7756-7764.
- 237 S3. Z. W. Huang, Z. J. Li, Q. Y. Wu, L. R. Zheng, L. M. Zhou, Z. F. Chai, X. L. Wang and  
238 W. Q. Shi, *Environ. Sci.-Nano*, 2018, **5**, 2077-2087.
- 239 S4. C. C. Chang, C. Y. Liu, S. Y. Wu and M. K. Tsai, *Phys. Chem. Chem. Phys.*, 2017, **19**,  
240 4989-4996.
- 241 S5. H. S. Moon, J. H. Lee, S. Kwon, I. T. Kim and S. G. Lee, *Carbon Lett.*, 2015, **16**, 116-  
242 120.
- 243 S6. G. Qu, J. Cheng, X. Li, D. Yuan, P. Chen, X. Chen, B. Wang and H. Peng, *Adv. Mater.*,  
244 2016, **28**, 3646-3652.
- 245 S7. W. W. Liu, Y. Q. Feng, X. B. Yan, J. T. Chen and Q. J. Xue, *Adv. Funct. Mater.*, 2013,  
246 **23**, 4111-4122.
- 247 S8. L. Kou, T. Huang, B. Zheng, Y. Han, X. Zhao, K. Gopalsamy, H. Sun and C. Gao, *Nat.*  
248 *Commun.*, 2014, **5**, 3754.
- 249 S9. C. J. Zhang, M. P. Kremer, A. Seral-Ascaso, S. H. Park, N. McEvoy, B. Anasori, Y.  
250 Gogotsi and V. Nicolosi, *Adv. Funct. Mater.*, 2018, **28**, 1705506.
- 251 S10. G. Lee, S. K. Kang, S. M. Won, P. Gutruf, Y. R. Jeong, J. Koo, S. S. Lee, J. A. Rogers  
252 and J. S. Ha, *Adv. Energy Mater.*, 2017, **7**, 1700157.
- 253 S11. P. Sun, R. Lin, Z. Wang, M. Qiu, Z. Chai, B. Zhang, H. Meng, S. Tan, C. Zhao and W.  
254 Mai, *Nano Energy*, 2017, **31**, 432-440.
- 255 S12. Y. Huang, H. Hu, Y. Huang, M. Zhu, W. Meng, C. Liu, Z. Pei, C. Hao, Z. Wang and  
256 C. Zhi, *ACS Nano*, 2015, **9**, 4766-4775.
- 257 S13. B. Konkena and S. Vasudevan, *J. Phys. Chem. Lett.*, 2012, **3**, 867-872.
- 258
